# Supplementary material for: DOX-encapsulated intelligent PAA-g-PEG/PEG–Fa polymeric micelles for intensifying antitumor therapeutic effect via active-targeted tumor accumulation
Source: Royal Society of Chemistry journal article supplement (doi:10.1039/c5tb00438a), 2015-01-01
Supplement: c5tb00438a4.pdf [file c5tb00438a4.pdf]

DOX-encapsulated intelligent PAA-*g*-PEG/PEG-Fa polymeric micelles for  
intensifying antitumoral therapeutic effect via active-targeted tumor accumulation

Yong Sun, Yaning Wang, Yani Cui, Wen Zou, Yanfei Tan, Jie Liang, Yujiang Fan\*, Xingdong Zhang

National Engineering Research Center for Biomaterials, Sichuan University,

Supporting Information

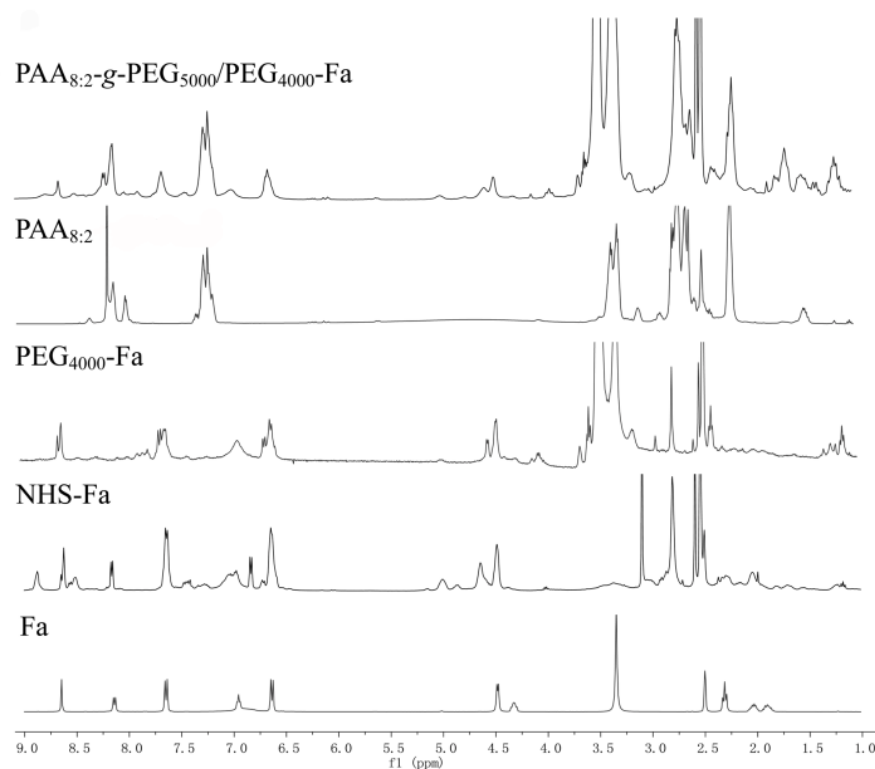

**Figure S1** The  $^1\text{H}$  NMR spectra of amphiphilic PAA<sub>8:2</sub>-*g*-PEG<sub>5000</sub>/PEG<sub>4000</sub>-Fa, hydrophobic PAA<sub>8:2</sub>, PEG<sub>4000</sub>-Fa, NHS-Fa and Fa.

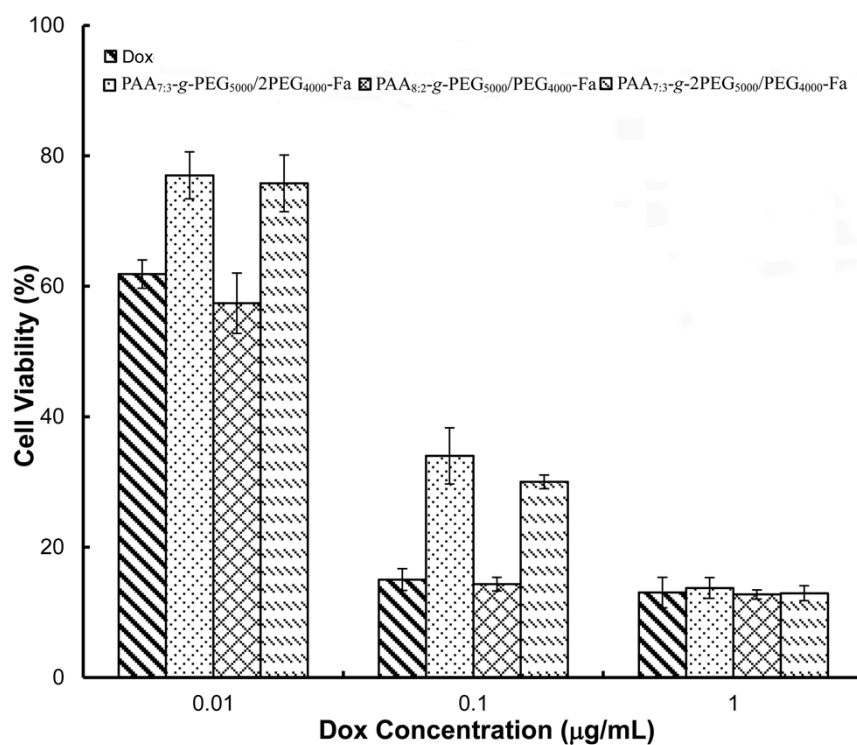

**Figure S2** Cytotoxicity study of Dox-incorporated free DOX, PAA<sub>7.3</sub>-g-PEG<sub>5000</sub>/2PEG<sub>4000</sub>-Fa, PAA<sub>8.2</sub>-g-PEG<sub>5000</sub>/PEG<sub>4000</sub>-Fa, PAA<sub>7.3</sub>-g-2PEG<sub>5000</sub>/PEG<sub>4000</sub>-Fa micelles against KB cancer cell after incubation for 3 days. The standard deviation for each data point was averaged over five samples (n = 5).
