# Supplementary figures and images for: DOX-encapsulated intelligent PAA-g-PEG/PEG–Fa polymeric micelles for intensifying antitumor therapeutic effect via active-targeted tumor accumulation
Source: Royal Society of Chemistry journal article supplement (doi:10.1039/c5tb00438a), 2015-01-01

PAA<sub>8:2</sub>-g-PEG<sub>5000</sub>/PEG<sub>4000</sub>-Fa

PAA<sub>8:2</sub>

PEG<sub>4000</sub>-Fa

NHS-Fa

Fa

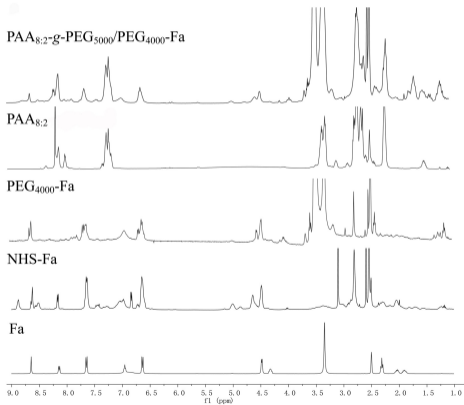

Supplement: c5tb00438a2.pdf [file c5tb00438a2.pdf]

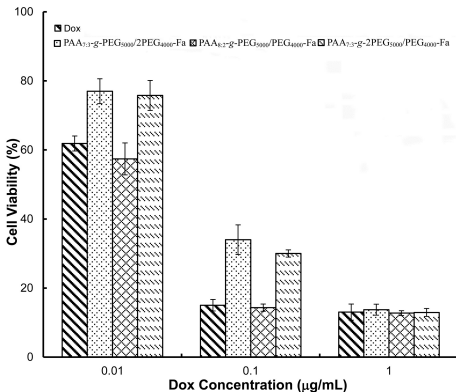

Supplement: c5tb00438a3.pdf [file c5tb00438a3.pdf]
